# Supplementary material
Source: Springer Nature journal article supplement (https://www.springermedizin.de/resource/supplementary/12865_2009_265_MOESM5_ESM.pdf/9427632)

## TRIF mRNA qPCR

Relative expression of TRIF mRNA  
normalized to GAPDH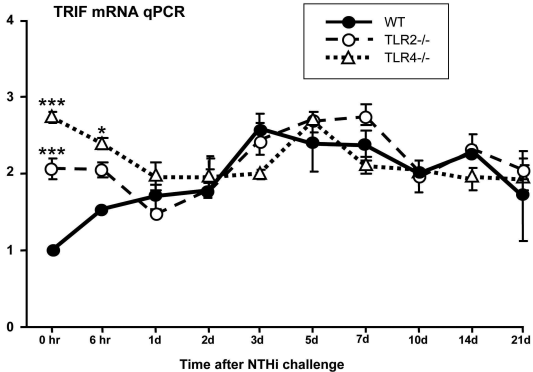

Supplement: MOESM5 [file 9427632]
